# Supplementary material for: Bone morphogenetic protein (BMP) signaling determines neuroblastoma cell fate and sensitivity to retinoic acid
Source: Springer Nature journal article supplement (doi:10.1038/s41467-025-57185-y), 2025-02-28
Supplement: MOESM13 [file 41467_2025_57185_MOESM13_ESM.pdf]

## Reporting Summary

Nature Portfolio wishes to improve the reproducibility of the work that we publish. This form provides structure for consistency and transparency in reporting. For further information on Nature Portfolio policies, see our [Editorial Policies](#) and the [Editorial Policy Checklist](#).

### Statistics

For all statistical analyses, confirm that the following items are present in the figure legend, table legend, main text, or Methods section.

n/a Confirmed

- |                                     |                                     |                                                                                                                                                                                                                                                            |
|-------------------------------------|-------------------------------------|------------------------------------------------------------------------------------------------------------------------------------------------------------------------------------------------------------------------------------------------------------|
| <input type="checkbox"/>            | <input checked="" type="checkbox"/> | The exact sample size ( $n$ ) for each experimental group/condition, given as a discrete number and unit of measurement                                                                                                                                    |
| <input type="checkbox"/>            | <input checked="" type="checkbox"/> | A statement on whether measurements were taken from distinct samples or whether the same sample was measured repeatedly                                                                                                                                    |
| <input type="checkbox"/>            | <input checked="" type="checkbox"/> | The statistical test(s) used AND whether they are one- or two-sided<br><i>Only common tests should be described solely by name; describe more complex techniques in the Methods section.</i>                                                               |
| <input checked="" type="checkbox"/> | <input type="checkbox"/>            | A description of all covariates tested                                                                                                                                                                                                                     |
| <input checked="" type="checkbox"/> | <input type="checkbox"/>            | A description of any assumptions or corrections, such as tests of normality and adjustment for multiple comparisons                                                                                                                                        |
| <input type="checkbox"/>            | <input checked="" type="checkbox"/> | A full description of the statistical parameters including central tendency (e.g. means) or other basic estimates (e.g. regression coefficient) AND variation (e.g. standard deviation) or associated estimates of uncertainty (e.g. confidence intervals) |
| <input type="checkbox"/>            | <input checked="" type="checkbox"/> | For null hypothesis testing, the test statistic (e.g. $F$ , $t$ , $r$ ) with confidence intervals, effect sizes, degrees of freedom and $P$ value noted<br><i>Give <math>P</math> values as exact values whenever suitable.</i>                            |
| <input checked="" type="checkbox"/> | <input type="checkbox"/>            | For Bayesian analysis, information on the choice of priors and Markov chain Monte Carlo settings                                                                                                                                                           |
| <input checked="" type="checkbox"/> | <input type="checkbox"/>            | For hierarchical and complex designs, identification of the appropriate level for tests and full reporting of outcomes                                                                                                                                     |
| <input checked="" type="checkbox"/> | <input type="checkbox"/>            | Estimates of effect sizes (e.g. Cohen's $d$ , Pearson's $r$ ), indicating how they were calculated                                                                                                                                                         |

Our web collection on [statistics for biologists](#) contains articles on many of the points above.

### Software and code

Policy information about [availability of computer code](#)

Data collection

N/A

Data analysis

Trimalore v0.4.4, BWA v0.7.17, Samtools v1.9, bedtools v2.17.0, MACS2 v2.1.1, deepTools v3.5.0, DESeq2, clusterProfiler R package, ChIPseeker R package, Pscan-ChIP v1.3, STAR v2.7.10a, RSEM v1.3.3, acNMF (<https://rchapple2.github.io/acNMF/>)

For manuscripts utilizing custom algorithms or software that are central to the research but not yet described in published literature, software must be made available to editors and reviewers. We strongly encourage code deposition in a community repository (e.g. GitHub). See the Nature Portfolio [guidelines for submitting code & software](#) for further information.

### Data

Policy information about [availability of data](#)

All manuscripts must include a [data availability statement](#). This statement should provide the following information, where applicable:

- Accession codes, unique identifiers, or web links for publicly available datasets
- A description of any restrictions on data availability
- For clinical datasets or third party data, please ensure that the statement adheres to our [policy](#)

primary datasets: GSE253785 and GSE253786; referenced datasets GSE216176, GSE137804, EGAD00001008345, GSE228957 and GSE229224

## Research involving human participants, their data, or biological material

Policy information about studies with [human participants or human data](#). See also policy information about [sex, gender \(identity/presentation\), and sexual orientation](#) and [race, ethnicity and racism](#).

|                                                                    |                                                                                                                                                                                                                                                                                                                                                                                                                                                                                                                                                                                                                                                                                                                                                                                                                                  |
|--------------------------------------------------------------------|----------------------------------------------------------------------------------------------------------------------------------------------------------------------------------------------------------------------------------------------------------------------------------------------------------------------------------------------------------------------------------------------------------------------------------------------------------------------------------------------------------------------------------------------------------------------------------------------------------------------------------------------------------------------------------------------------------------------------------------------------------------------------------------------------------------------------------|
| Reporting on sex and gender                                        | Sex or gender of patients is provided and not considered in this study.                                                                                                                                                                                                                                                                                                                                                                                                                                                                                                                                                                                                                                                                                                                                                          |
| Reporting on race, ethnicity, or other socially relevant groupings | Race or ethnicity of patients is not considered in this study.                                                                                                                                                                                                                                                                                                                                                                                                                                                                                                                                                                                                                                                                                                                                                                   |
| Population characteristics                                         | <p>Patient, Primary tumor, Bone marrow, Pre or post treatment, Bone marrow sample collected at:, Retinoic acid treatment prior to sample collection, Status</p> <p>1, S-11-01614, H-13-01918, Post, relapse, no (CAE) for primary tumor YES before bone marrow relapse, alive with recurrent disease</p> <p>2, S-12-01298, H-12-00639, Post, diagnosis, no (CAE), died ~10 years later cause unknown</p> <p>3, S-16-00711, H-16-00303, Pre, diagnosis, no (CAE), alive</p> <p>4, S-16-01131, H-16-00517, Pre, diagnosis, no (cyclo/doxo/melphalan), alive</p> <p>5, S-16-02264, H-16-01267, Pre, post-treatment no (cyclo/topotecan/cisplatin/etoposide/doxo/vincristine), alive</p> <p>6, S-16-02291, H-16-00759, Post, diagnosis, no (per NB2012 induction), died ~6 years later (complications of relapsed neuroblastoma)</p> |
| Recruitment                                                        | Neuroblastoma tissues were obtained from the Tissue Bank at St. Jude Children's Research Hospital.                                                                                                                                                                                                                                                                                                                                                                                                                                                                                                                                                                                                                                                                                                                               |
| Ethics oversight                                                   | <p>Patient tumor tissues were used under institutional review board (IRB) approval from St. Jude Children's Research Hospital. The patients weren't consented for this study, but all samples were consented for future unspecified research. No participant compensation was provided because this is non-human subjects research so there is no interaction or intervention with the subjects or their identifiable data or biospecimens for this study.</p>                                                                                                                                                                                                                                                                                                                                                                   |

Note that full information on the approval of the study protocol must also be provided in the manuscript.

## Field-specific reporting

Please select the one below that is the best fit for your research. If you are not sure, read the appropriate sections before making your selection.

☒ Life sciences ☐ Behavioural & social sciences ☐ Ecological, evolutionary & environmental sciences

For a reference copy of the document with all sections, see [nature.com/documents/nr-reporting-summary-flat.pdf](https://www.nature.com/documents/nr-reporting-summary-flat.pdf)

## Life sciences study design

All studies must disclose on these points even when the disclosure is negative.

|                 |                                                                                  |
|-----------------|----------------------------------------------------------------------------------|
| Sample size     | Sample sizes were dependent on availability of sensitive neuroblastoma cell line |
| Data exclusions | No data was excluded from data analyses                                          |
| Replication     | Replication was performed for high-throughput drug screen and sequencing data    |
| Randomization   | No randomization was performed.                                                  |
| Blinding        | No blinding was performed                                                        |

## Reporting for specific materials, systems and methods

We require information from authors about some types of materials, experimental systems and methods used in many studies. Here, indicate whether each material, system or method listed is relevant to your study. If you are not sure if a list item applies to your research, read the appropriate section before selecting a response.

## Materials &amp; experimental systems

|                                     |                                                                 |
|-------------------------------------|-----------------------------------------------------------------|
| n/a                                 | Involved in the study                                           |
| <input type="checkbox"/>            | <input checked="" type="checkbox"/> Antibodies                  |
| <input type="checkbox"/>            | <input checked="" type="checkbox"/> Eukaryotic cell lines       |
| <input checked="" type="checkbox"/> | <input type="checkbox"/> Palaeontology and archaeology          |
| <input type="checkbox"/>            | <input checked="" type="checkbox"/> Animals and other organisms |
| <input checked="" type="checkbox"/> | <input type="checkbox"/> Clinical data                          |
| <input checked="" type="checkbox"/> | <input type="checkbox"/> Dual use research of concern           |
| <input checked="" type="checkbox"/> | <input type="checkbox"/> Plants                                 |

## Methods

|                                     |                                                    |
|-------------------------------------|----------------------------------------------------|
| n/a                                 | Involved in the study                              |
| <input type="checkbox"/>            | <input checked="" type="checkbox"/> ChIP-seq       |
| <input type="checkbox"/>            | <input checked="" type="checkbox"/> Flow cytometry |
| <input checked="" type="checkbox"/> | <input type="checkbox"/> MRI-based neuroimaging    |

## Antibodies

## Antibodies used

MAP2 Cell Signaling, # 4542, 1:500 for western blot, 1:200 for IF.  
 NEFH Cell Signaling, # 55453, 1:200 for IF.  
 Alexa fluor 594 conjugate anti-rabbit IgG Cell Signaling, # 8889, 1:500.  
 PHOX2B Abcam, # ab183741, 1:100.  
 SMAD1/5/9 (phospho S463 + S465 + S467) Abcam, #ab92698, 1:250.  
 Vimentin Roche, #790-2917, ready to use.  
 HA tag Cell Signaling, # 3724, 1:50.  
 SMAD4 R&D Systems, # AF2097, use 20 µg per 20 million cells.  
 RARA R&D Systems, # PP-H1920-00, use 20 µg per 20 million cells.  
 β-Actin Sigma, # A1978, 1:20,000.  
 GAPDH ThermoFisher, # MA5-15738, 1:20,000.  
 cleaved PARP Cells Signaling, # 5625, 1:1000.  
 PARP Cell Signaling, # 9542, 1:1000.  
 SMAD9 ThermoFisher, # 720333, 1:500.  
 SMAD1 Cell Signaling, # 6944, 1:1000.  
 pSMAD1/5/9 Cell Signaling, # 13820, 1:500.  
 Total SMAD1/5/9 Abcam, # ab13723, 1:1000.  
 ACVR1 Abcam, # ab155981, 1:500.  
 HRP-linked anti-rabbit IgG Cell Signaling, # 7074, 1:2000.  
 HRP-linked anti-mouse IgG Cell Signaling, # 7076, 1:2000.  
 Alexa Fluor 488 conjugated annexin V Thermo Fisher, # A13201, 1:500.

## Validation

Antibody Validation  
 MAP2 Manufacture's website  
 NEFH Manufacture's website  
 Alexa fluor 594 conjugate anti-rabbit IgG Manufacture's website  
 PHOX2B Manufacture's website  
 SMAD1/5/9 (phospho S463 + S465 + S467) Manufacture's website  
 Vimentin Manufacture's website  
 HA tag Manufacture's website  
 SMAD4 Manuscript  
 RARA Manuscript  
 β-Actin Manufacture's website  
 GAPDH Manufacture's website  
 cleaved PARP Manufacture's website  
 SMAD9 Manufacture's website  
 SMAD1 Manufacture's website  
 pSMAD1/5/9 Manufacture's website  
 ACVR1 Manufacture's website  
 MAP2 Manufacture's website  
 HRP-linked anti-rabbit IgG Manufacture's website  
 HRP-linked anti-mouse IgG Manufacture's website  
 Alexa Fluor 488 conjugated annexin V Manufacture's website

## Eukaryotic cell lines

Policy information about [cell lines and Sex and Gender in Research](#)

## Cell line source(s)

Cell line Source Catlog # Sex  
 CHP-134 Millipore Sigma, USA 6122002 Male  
 NB13 St. Jude Children's Research Hospital N/A Male  
 KELLY Millipore Sigma, USA 92110411 Female

TGW Xenotech JCRB0618 Male  
 SK-N-SH Millipore Sigma, USA 86012802 Female  
 SK-N-FI ATCC CRL-2142 Male  
 NGP DSMZ (dsmz.de) ACC 676 Male  
 GI-ME-N DSMZ (dsmz.de) ACC 654 Female  
 MHH-NB-11 DSMZ (dsmz.de) ACC 157 Male  
 BE(2)-C ATCC CRL-2268 Male  
 BE(2)-M17 ATCC CRL-2267 Male  
 CHP-212 ATCC CRL-2273 Male  
 SK-N-AS ATCC CRL-2137 Female  
 D283 Med ATCC HTB-185 Male  
 SK-ES-1 ATCC HTB-86 Male  
 SK-MEL-2 ATCC HTB-68 Male  
 HCT 116 ATCC CCL-247 Male  
 RH30 ATCC CRL-2061 Male  
 293T ATCC CRL-3216 Female  
 Cell line Source Catlog # Sex  
 CHP-134 Millipore Sigma, USA 6122002 Male  
 NB13 St. Jude Children's Research Hospital N/A Male  
 KELLY Millipore Sigma, USA 92110411 Female  
 TGW Xenotech JCRB0618 Male  
 SK-N-SH Millipore Sigma, USA 86012802 Female  
 SK-N-FI ATCC CRL-2142 Male  
 NGP DSMZ (dsmz.de) ACC 676 Male  
 GI-ME-N DSMZ (dsmz.de) ACC 654 Female  
 MHH-NB-11 DSMZ (dsmz.de) ACC 157 Male  
 BE(2)-C ATCC CRL-2268 Male  
 BE(2)-M17 ATCC CRL-2267 Male  
 CHP-212 ATCC CRL-2273 Male  
 SK-N-AS ATCC CRL-2137 Female  
 D283 Med ATCC HTB-185 Male  
 SK-ES-1 ATCC HTB-86 Male  
 SK-MEL-2 ATCC HTB-68 Male  
 HCT 116 ATCC CCL-247 Male  
 RH30 ATCC CRL-2061 Male  
 293T ATCC CRL-3216 Female

Authentication

The cell lines were not authenticated.

Mycoplasma contamination

All cell lines were tested negative for mycoplasma using the MycoAlert mycoplasma detection kit (Lonza, LT07-118).

Commonly misidentified lines  
(See [ICLAC](#) register)

No commercially misidentified cell lines were used in this study.

## Animals and other research organisms

Policy information about [studies involving animals](#); [ARRIVE guidelines](#) recommended for reporting animal research, and [Sex and Gender in Research](#)

Laboratory animals

Athymic nude mice (Charles River strain code 553)

Wild animals

No wild animals were used in this study.

Reporting on sex

Animal sex was considered in this study.

Field-collected samples

No field-collected samples were used in this study.

Ethics oversight

The study protocol was approved by the Institutional Animal Care and Use Committee at St. Jude Children's Research Hospital.

Note that full information on the approval of the study protocol must also be provided in the manuscript.

## Plants

Seed stocks No plant used in this study.

Novel plant genotypes N/A

Authentication N/A

## ChIP-seq

### Data deposition

☒ Confirm that both raw and final processed data have been deposited in a public database such as [GEO](#).

☒ Confirm that you have deposited or provided access to graph files (e.g. BED files) for the called peaks.

Data access links *May remain private before publication.* in the GEO database under the accession numbers GSE253786

Files in database submission *Provide a list of all files available in the database submission.*

Genome browser session *Provide a link to an anonymized genome browser session for "Initial submission" and "Revised version" documents only, to enable peer review. Write "no longer applicable" for "Final submission" documents.*  
(e.g. [UCSC](#))

### Methodology

Replicates Each experiment has two independent replicates.

Sequencing depth shown in Table S3

Antibodies HA tag Cell Signaling, # 3724  
SMAD4 R&D Systems, # AF2097  
RARA R&D Systems, # PP-H1920-00

Peak calling parameters MACS2 v2.1.1 was utilized to identify ChIP-seq signal enriched regions (narrow peaks) with the significance cut-off q-value  $\leq 0.05$

Data quality identify ChIP-seq signal enriched regions with the significance cut-off q-value  $\leq 0.05$

Software trimgalore v0.4.4 was applied to remove low quality reads and adaptor with default setting  
ChIP-seq reads were aligned to the UCSC hg38 genome using BWA mem v0.7.17 with default setting  
To generate genome-wide coverage profiles, the bedtools v2.17.0 "genomecov" command was applied, and the output was converted to bigwig files using bedGraphToBigWig  
MACS2 v2.1.1 was utilized to identify ChIP-seq signal enriched regions (narrow peaks) with the significance cut-off q-value  $\leq 0.05$

## Flow Cytometry

### Plots

Confirm that:

- ☒ The axis labels state the marker and fluorochrome used (e.g. CD4-FITC).
- ☒ The axis scales are clearly visible. Include numbers along axes only for bottom left plot of group (a 'group' is an analysis of identical markers).
- ☒ All plots are contour plots with outliers or pseudocolor plots.
- ☒ A numerical value for number of cells or percentage (with statistics) is provided.

### Methodology

Sample preparation For apoptosis, cells were treated in 6-well plates. After incubation for the time needed, cell culture medium and cells were collected and washed in cold phosphate-buffered saline (PBS). The cells were then resuspended in annexin-binding buffer and stained with Alexa Fluor 488 conjugated annexin V (Thermo Fisher, catalog# A13201) and 1  $\mu\text{g/ml}$  Propidium iodide (PI) for flow cytometry analysis.

|                           |                                                                                                                                                                                                      |
|---------------------------|------------------------------------------------------------------------------------------------------------------------------------------------------------------------------------------------------|
| Instrument                | BD LSRFortess X-20                                                                                                                                                                                   |
| Software                  | BD FACSDiva and FlowJo                                                                                                                                                                               |
| Cell population abundance | 10,000 events were collected for each replicate. Single cells were used for analysis. Single cells were defined by cell size using FSC-A and SSC-W. Details are included in Supplementary figure 11. |
| Gating strategy           | Detailed gating strategies are included in Supplementary figure 11.                                                                                                                                  |

☒ Tick this box to confirm that a figure exemplifying the gating strategy is provided in the Supplementary Information.
